## Objective Criteria for Crohn-like Lymphoid Reaction in Colorectal Cancer

Hideki Ueno, MD, PhD<sup>1</sup>, Yojiro Hashiguchi, MD, PhD,<sup>1</sup> Hideyuki Shimazaki, MD, PhD,<sup>2</sup> Eiji Shinto, MD, PhD,<sup>1</sup> Yoshiki Kajiwara, MD, PhD,<sup>1</sup> Kuniaki Nakanishi, MD, PhD,<sup>2</sup> Kei Kato, MD, PhD,<sup>2</sup> Kazuya Maekawa, MD,<sup>2</sup> Kosuke Miyai, MD,<sup>3</sup> Takahiro Nakamura, PhD,<sup>4,5</sup> Junji Yamamoto, MD, PhD,<sup>1</sup> and Kazuo Hase, MD, PhD<sup>1</sup>

**Key Words:** Colorectal cancer; Crohn-like lymphoid reaction; Microsatellite instability; Mismatch repair gene protein; Prognosis

DOI: 10.1309/AJCPWHUEFTGBWKE4

### Abstract

*We aimed to determine semiquantitative evaluation criteria for Crohn-like lymphoid reaction (CLR). We reviewed 1,032 patients with colorectal cancer and evaluated CLR by counting all peritumoral lymphoid aggregates (LAs) and by measuring the maximum diameter of the largest LA. The maximum diameter of the largest LA, rather than the number, had a significant impact on survival. Active CLR determined by the 1-mm rule was significantly associated with MLH1/MSH2 immunohistochemical staining deficiency. The group with LAs 1 mm or larger had lower recurrence (P = .0008) and a higher survival rate (P < .0001) than that without LAs 1 mm or larger. These results were similarly observed in another cohort of 500 patients with colorectal cancer. The k values for CLR evaluation among 8 observers were 0.67 for the 1-mm rule and 0.50 for Graham's criteria. The size of the largest LA best reflects the specific characteristics of CLR, and the 1-mm rule is expected to improve assessment reproducibility.*

The lymphocytic reaction observed in resected colorectal cancer (CRC) specimens has long been recognized as an indicator of host immune responses to tumor cells.<sup>1</sup> A significant correlation between enhanced lymphocytic reaction and a favorable prognostic outcome had been observed in various activities involving lymphocytic systems, including peritumoral lymphocytic infiltration,<sup>2-5</sup> tumor lymphocyte infiltration of cancer nests,<sup>3,6,7</sup> and lymphoid hyperplasia in regional lymph nodes.<sup>5,8,9</sup>

The histologic feature of nodular lymphoid aggregates (LAs) at the periphery of the carcinoma also reflects the activation of the lymphatic system against tumors. Pihl et al<sup>9</sup> first paid attention to this characteristic and coined the term *perivascular lymphocyte cuffs*, defined as the areas occupied by sheaths of small, dark lymphocytes in the muscle and pericolic/rectal fat at the tumor periphery. They demonstrated that this phenomenon was a putative manifestation of host immunological response to invasive carcinoma.<sup>9,10</sup> Subsequently, Graham and Appelman<sup>11</sup> referred to peritumoral LAs as a Crohn-like reaction (CLR) because of their resemblance to part of the inflammatory component of Crohn disease. We now use the term *CLR* for all nodular LAs, irrespective of whether they are located adjacent to the venules,<sup>11</sup> and currently the term *CLR* appears to be more familiar to pathologists than *perivascular lymphocyte cuffs*. Many studies have shown that CLR is a feature associated with favorable outcomes,<sup>3,5,11-14</sup> and it has recently been demonstrated to be associated with mismatch repair (MMR) status and to be one of the histologic markers of microsatellite instability (MSI).<sup>15-20</sup>

For assessing CLR, the method proposed by Graham and Appelman (Graham's method)<sup>11</sup> is widely used.<sup>12,13,15,20</sup> According to this method, CLR is classified into 3 grades

based on the number and size of LAs and number of germinal centers. More specifically, grade 0 is defined as no LA or, at most, 1 single small LA in all tumor sections; grade 1, occasional, small LAs with rare or absent germinal centers; and grade 2, numerous large LAs with frequent germinal centers. More recently, Harrison et al<sup>21</sup> combined grades 0 and 1 into what they termed as the inconspicuous group and classified grade 2 as the conspicuous group.

As is clear from the definition, according to Graham's method,<sup>11</sup> CLR grading is determined in a subjective manner and each category is multifactorial; however, few studies have been conducted to assess the reproducibility of such evaluations.<sup>12</sup> There have also been few attempts to determine the optimal criteria for assessing CLR status. In the present study, we examined the impact of histologic characteristics associated with CLR (ie, the number and size of LAs) on postoperative survival outcome. We then attempted to identify semiquantitative CLR criteria favoring objective evaluation in routine practice.

## Materials and Methods

### Patients

A total of 1,032 patients with CRC who had undergone potentially curative surgery at the Department of Surgery, National Defense Medical College, Tokorozawa, Japan, between 1980 and 1999 and who had no distant metastasis at the time of surgery were enrolled. All CRCs were pathologically confirmed as having penetrated into or through the muscularis propria layer. This data set (first cohort) included 601 men and 431 women (average age, 61.8 years; range, 21-91 years). The follow-up period was a minimum of 5 years or until death. No patient received preoperative adjuvant therapy or postoperative therapy, such as radiation therapy or intensive chemotherapy with intravenous administration of chemotherapeutic agents.

To validate the results, we enrolled 500 consecutive patients with CRC who had undergone curatively intended surgery as the second cohort. T1 CRC patients were excluded. All patients underwent surgery at the above-mentioned institute between 2000 and 2005. The median age of these patients was 66 years (range, 18-96 years); 280 and 220 tumors were resected from male and female patients, respectively. No patient received preoperative adjuvant therapy. Regarding postoperative adjuvant chemotherapy, 245 patients received chemotherapy, 96 received 5-fluorouracil/leucovorin (FU/LV), 56 received uracil/tegafur (UFT)/LV, and 93 received oral anticancer drugs such as UFT, 5'-deoxy-5-fluorouridine, capecitabine, or 5-FU. No adjuvant therapy was administered to 247 patients, and no detailed information on postoperative

adjuvant therapy could be obtained for 8 patients. Detailed prognostic information, including the recurrence pattern at 5 years after surgery, was obtained for 483 patients (96.6%); the median follow-up period for the 378 survivors was 68 months.

### Histologic Evaluation

Surgically resected specimens were routinely processed according to the guidelines of the Japanese General Rules for Clinical and Pathologic Studies on Cancer of the Colon, Rectum, and Anus.<sup>22</sup> After fixation in formalin solution, the tumors were sequentially sectioned along the long axis of the intestine to include the tumor center. One of the authors (H.U.) performed histopathologic evaluation of CLR and tumor budding using H&E-stained glass slides prepared from a single longitudinal section of the whole tumor, including its deepest part. The median number of slides examined per patient was 2 (range, 1-9) for the first cohort and 2 (range, 1-10) for the second cohort.

### Crohn-like Lymphoid Reaction

Nodular LAs lining the tumor periphery were evaluated with regard to the CLR status (Image 1). The following were not evaluated as LAs associated with CLR: (1) LAs from mucosa-associated lymphoid tissue (ie, located within the mucosal layer or just below the muscularis mucosae), (2) LAs judged to be part of small lymph nodes rather than LAs associated with CLR on the basis of the existence of circumferential connective tissue around LAs, and (3) nonnodular LAs, including irregularly shaped as well as long and narrow ones. We regarded small LAs as those in which the number of lymphocytes appeared to increase in comparison to those in the background but which had no definite "aggregation," so we created a yardstick of 300  $\mu$ m or larger in size for positive determination of LAs.

To examine the prognostic impact of the number of LAs, we evaluated the following parameters: (1) the total number of LAs observed on all slides covering the entire tumor, (2) the average number of LAs observed per slide, and (3) the number of LAs in a  $\times 2$  microscopic objective lens field where CLR was most intense. In addition, the largest LA in each patient was identified and its maximum diameter was determined with a calibrated ocular reticule (Image 1). The outline of LAs for measurement was determined under low-power magnification.

### Tumor Budding

Tumor budding was determined according to a previously described method.<sup>23</sup> It was defined as either a single cancer cell or clusters of fewer than 5 cancer cells observed in the invasive frontal region. To determine the degree of tumor budding, the clusters were counted under a magnification of  $\times 200$  in the field where budding was most intensive. Tumors

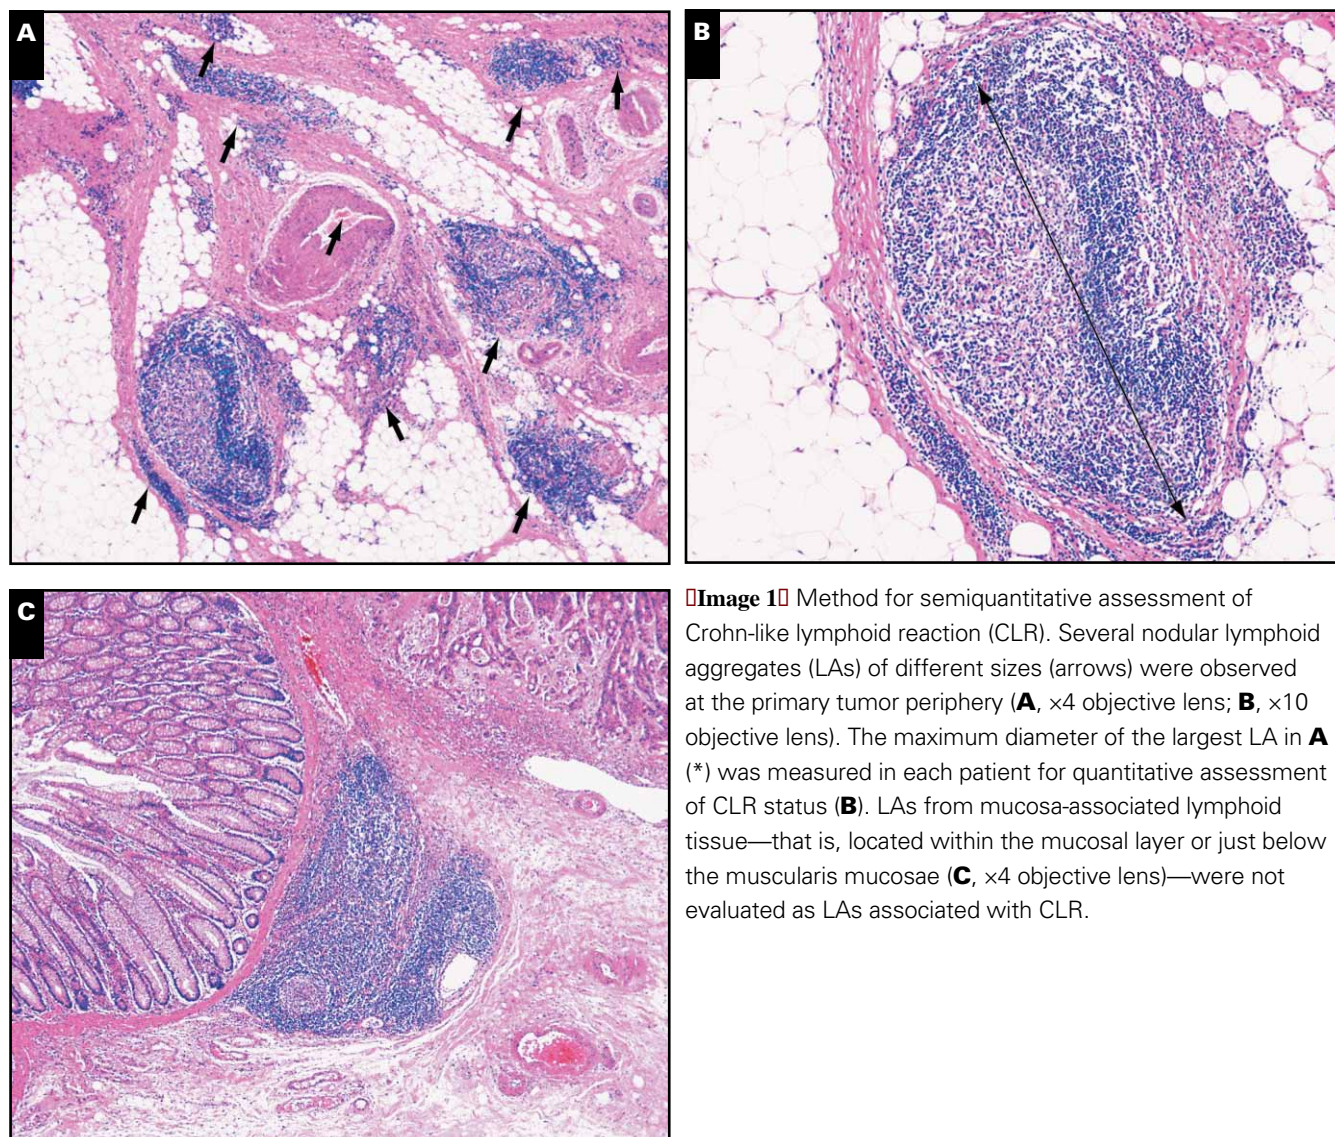

**Image 1** Method for semiquantitative assessment of Crohn-like lymphoid reaction (CLR). Several nodular lymphoid aggregates (LAs) of different sizes (arrows) were observed at the primary tumor periphery (**A**,  $\times 4$  objective lens; **B**,  $\times 10$  objective lens). The maximum diameter of the largest LA in **A** (\*) was measured in each patient for quantitative assessment of CLR status (**B**). LAs from mucosa-associated lymphoid tissue—that is, located within the mucosal layer or just below the muscularis mucosae (**C**,  $\times 4$  objective lens)—were not evaluated as LAs associated with CLR.

with less than 5, 5 to 9, and 10 or more budding foci were classified as G1, G2, and G3, respectively.

### MLH1 and MSH2 Protein Immunohistochemistry

A total of 225 T3 or T4 CRC patients who underwent curative surgery between 1995 and 1999 were evaluated. MLH1 and MSH2 protein expression was determined by immunohistochemistry of formalin-fixed, paraffin-embedded tumor tissue sections using mouse monoclonal antibodies G168-728 (1:100; Pharmingen, San Diego, CA) and G219-1129 (1:500; Pharmingen). Tumors showing complete loss of nuclear MLH1 or MSH2 expression were classified as MLH1 or MSH2 negative. Nuclear immunostaining of normal epithelial cells, lymphocytes, and stromal cells served as internal positive controls in each case. Tumors with normal nuclear expression of both proteins were considered to exhibit intact

MMR protein expression, whereas those classified as MLH1 negative or MSH2 negative were considered to show defective expression.

### Interobserver Studies

An interobserver study was conducted by circulating glass slides from 100 patients serially treated at the National Defense Medical College Hospital between 1996 and 1998 to examine interobserver reproducibility in evaluating the histologic lymphoid reaction (ie, CLR by Graham's criteria,<sup>11</sup> CLR by the semiquantitative method, and lymphoid infiltration by the criteria of Jass et al<sup>24</sup>). Glass slides prepared from a single longitudinal section of the whole tumor, including the deepest part of the tumor, were used for this study; the median number of slides evaluated per patient was 2 (range, 1-5). This study involved H.U. and an additional 7 observers (H.S., E.S., Y.K.,

K.N., K.K., K. Maekawa, and K. Miyai), who evaluated CLR using the semiquantitative method for the first time; prior to examination, they understood the concept only on the basis of the scheme shown in Image 1. No direct hands-on instruction was provided to them regarding microscopic evaluation of CLR.

### Statistical Analyses

Disease-specific and overall survival rates were calculated using the Kaplan-Meier method, and comparisons were made using the log-rank test. The association between parameters linked with CLR and other clinicopathologic characteristics of known prognostic significance (tumor differentiation pattern, depth of tumor penetration, nodal involvement, and lymphatic and venous invasion, which previously had been recorded in pathological reports) as well as recurrence patterns were analyzed by the  $\chi^2$  test or the Mann-Whitney *U* test. Cox proportional hazards regression analysis was used to determine the impact of conventional and novel histologic parameters on disease-specific survival. For interobserver assessments of histologic lymphoid reaction, the Fleiss  $\kappa$  value among the 8 observers was calculated to evaluate variability. Statistical calculations were performed using StatView version 5.0 software (SAS Institute, Cary, NC) and R software (version 2.8.1).

## Results

### Survival Implication of the Number and Size of LAs

Survival implications of LAs in terms of their number and size are shown in **Table 1**. Although we found that the total number of LAs varied widely, there was no significant correlation between the number and recurrence rate or 5-year disease-specific survival rate. The results were similar when we analyzed the prognostic impact of the number of LAs in a  $\times 2$  microscopic objective lens field where CLR was most intense.

In contrast, we found that a value of 1 mm for the maximum LA diameter was the cutoff point that distinguished the recurrence rate as well as the 5-year disease-specific survival rate (Table 1). The recurrence rate was significantly lower in the group with LAs 1 mm or larger (16.2%) than in the group without LAs 1 mm or larger (27.5%;  $P = .0008$ ).

In addition, more LAs were observed in patients with LAs 1 mm or larger (average, 36.3; 95% confidence interval (CI), 30.8-42.0) than in those without LAs 1 mm or larger (average, 10.5; 95% CI, 9.4-11.5;  $P < .0001$ ). However, there was no significant difference in the total number of LAs between the groups with and without recurrence when patients with LAs 1 mm or larger (34.4 [n = 34] and 36.7 [n = 176], respectively) and those without LAs 1 mm or larger (11.6 [n = 226] and 10.0 [n = 596], respectively) were examined separately.

**Table 1**  
Survival Outcome According to the Number and Size of Peritumoral Lymphoid Aggregates (LAs), First Cohort (n = 1,032)

| Characteristics of LAs (No. of Cases)                            | Recurrence Rate  |                             | DSS Rate at 5 y After Surgery |                             |
|------------------------------------------------------------------|------------------|-----------------------------|-------------------------------|-----------------------------|
|                                                                  | No. (%) of Cases | <i>P</i> Value <sup>a</sup> | %                             | <i>P</i> Value <sup>a</sup> |
| Total No. of LAs                                                 |                  |                             |                               |                             |
| 0-4 (325)                                                        | 78 (24.0)        | NS                          | 81.6                          | NS                          |
| 5-9 (226)                                                        | 57 (25.2)        |                             | 82.0                          |                             |
| 10-19 (249)                                                      | 66 (26.5)        |                             | 82.3                          |                             |
| 20-49 (168)                                                      | 46 (27.4)        |                             | 80.9                          |                             |
| ≥50 (64)                                                         | 13 (20.3)        |                             | 85.8                          |                             |
| Average No. of LAs per slide                                     |                  |                             |                               |                             |
| 0-4 (519)                                                        | 132 (25.4)       | NS                          | 80.1                          | NS                          |
| 5-9 (280)                                                        | 80 (28.6)        |                             | 81.6                          |                             |
| 10-19 (168)                                                      | 37 (22.0)        |                             | 85.2                          |                             |
| 20-49 (53)                                                       | 8 (15.1)         |                             | 88.6                          |                             |
| ≥50 (12)                                                         | 3 (25.0)         |                             | 91.7                          |                             |
| No. of LAs in the microscopic field of $\times 2$ objective lens |                  |                             |                               |                             |
| 0-4 (478)                                                        | 120 (25.1)       | NS                          | 80.7                          | NS                          |
| 5-9 (346)                                                        | 93 (26.9)        |                             | 81.8                          |                             |
| 10-14 (119)                                                      | 29 (24.4)        |                             | 86.1                          |                             |
| 15-19 (45)                                                       | 8 (17.8)         |                             | 84.0                          |                             |
| ≥20 (44)                                                         | 10 (22.7)        |                             | 84.1                          |                             |
| Maximum diameter (D) of the largest LA, mm                       |                  |                             |                               |                             |
| <0.5 (269)                                                       | 72 (26.8)        | 0.0008 <sup>b</sup>         | 78.9                          | <.0001 <sup>b</sup>         |
| 0.5-0.9 (553)                                                    | 154 (27.8)       |                             | 79.7                          |                             |
| 1.0-1.4 (153)                                                    | 25 (16.3)        |                             | 91.3                          |                             |
| 1.5-1.9 (42)                                                     | 7 (16.7)         |                             | 92.6                          |                             |
| ≥2.0 (15)                                                        | 2 (13.3)         |                             | 92.9                          |                             |

DSS, disease-specific survival; NS, not significant.

<sup>a</sup> Log-rank test.

<sup>b</sup> D <1.0-mm group (n = 825) vs D ≥1.0-mm group (n = 207).

Figure 1 demonstrates the favorable impact that LAs 1 mm or larger have on disease-specific and overall survival. Disease-specific survival at 5 years after surgery according to the presence or absence of LAs 1 mm or larger was 100% (n = 21) and 94.7% (n = 102), respectively, in stage I; 96.1% (n = 107) and 89.8% (n = 328), respectively, in stage II; and 85.8% (n = 78) and 66.4% (n = 396), respectively, in stage III (Figure 2). The superior survival outcome associated with LAs 1 mm or larger was statistically significant in stages II (P = .0271) and III (P = .0015). There was a marginal difference in the recurrence rate between patients with 1 LA 1 mm or larger and those with 2 or more LAs 1 mm or larger (20.4% and 11.3%, respectively; P = .0771); however, no statistical difference was observed in the disease-specific and overall survival rates between the 2 groups.

**Clinicopathologic Features of CLR According to the 1-mm Rule**

On the basis of the above results, we evaluated CLR status as being active for tumors with 1 or more LAs 1 mm or larger and as inactive for tumors with no LA 1 mm or larger. Active CLR was significantly associated with younger patients, right-sided colonic cancer, poorly differentiated tumors, greater number of lymph nodes retrieved, and involvement of fewer lymph nodes (Table 2).

Regarding MMR protein expression, 13 (5.8%) and 4 (1.8%) tumors showed loss of staining for MLH1 and MSH2, respectively. The incidence of defective expression of these MMR proteins was significantly higher in tumors

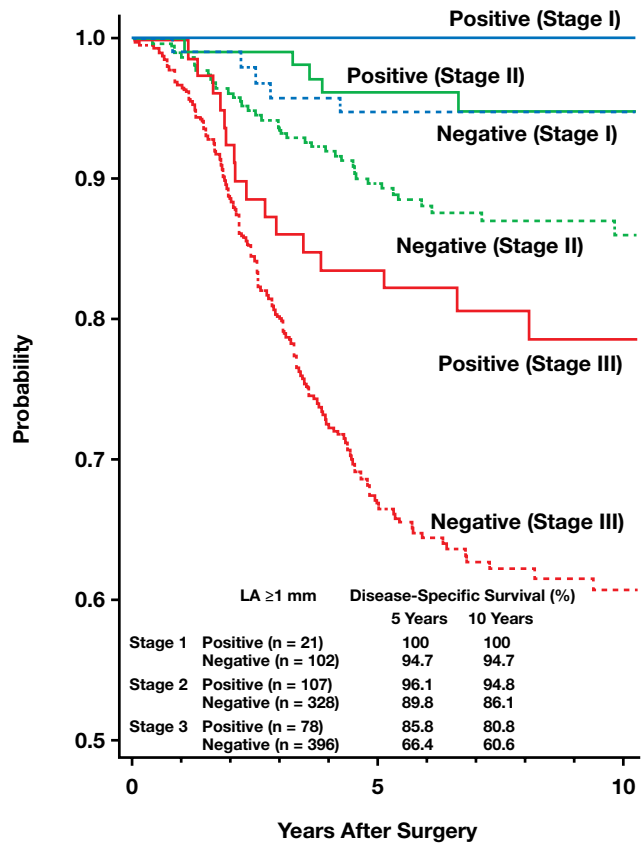

Figure 2 Disease-specific survival curves with or without lymphoid aggregates (LAs) ≥1 mm according to the tumor stage (first cohort).

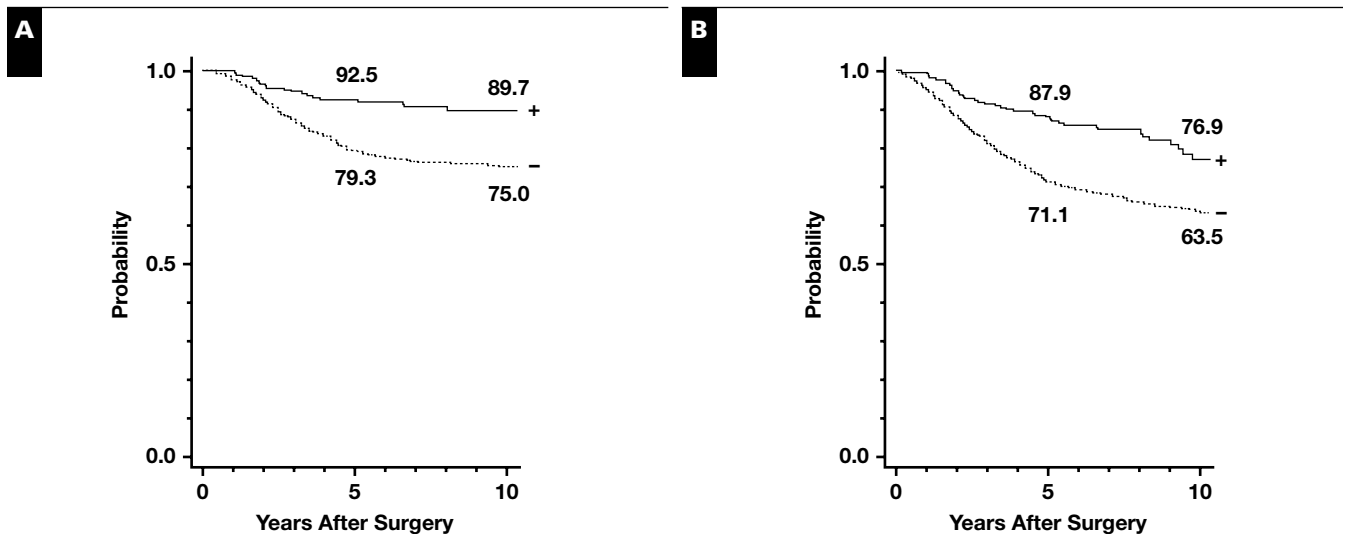

Figure 1 Disease-specific (A) and overall (B) survival curves with (+) (n = 206) or without (-) (n = 826) lymphoid aggregates ≥1 mm (first cohort). P < .0001.

with active CLR (18.2%) than in those with inactive CLR (5.7%) ( $P = .0236$ ).

### Recurrence Mode and Survival Impact of CLR by Multivariate Analysis

Active or inactive CLR status as defined by the 1-mm rule was relevant to recurrence in the lung (5.2% and 13.1%, respectively;  $P = .0014$ ), liver (6.2% and 12.9%, respectively;  $P = .0066$ ), and lymph node plus the local site (7.6% and 13.0%, respectively;  $P = .0312$ ).

The results of multivariate analysis using the Cox proportional hazards regression model are shown in **Table 3**. Active CLR status was found to have an independent survival impact on disease-specific survival together with other histologic parameters such as T stage, N stage, and tumor budding grade.

### Survival Impact of CLR in the Second Cohort

The total number of patients who had a tumor with 1 or more LAs 1 mm or larger was 186 (37.2%). Active CLR according to the 1-mm rule also had a favorable impact on disease-specific survival in the second cohort (Table 3). Similar to the results obtained in the first cohort, CLR status as evaluated by the 1-mm rule was selected as an independent prognostic parameter, along with T stage, N stage, venous invasion, and tumor budding.

### Interobserver Study

The Fleiss  $k$  value for CLR according to the 1-mm rule (active/inactive) was 0.67, whereas it was 0.50 for CLR assessed using Graham's criteria,<sup>11</sup> 0.56 for CLR assessed using criteria from Harrison et al,<sup>21</sup> and 0.15 for lymphocytic infiltration assessed using the criteria from Jass et al.<sup>24</sup>

## Discussion

A purely subjective method of assessing CLR had been employed in some studies whereby CLR status has been classified as either negative or positive without any criteria being specifically defined.<sup>5,10,19</sup> Graham's method,<sup>11</sup> which has been used most frequently in reported studies,<sup>12,13,15,20</sup> includes multiple factors as criteria for each category; however, these are also determined in a subjective manner. For example, Graham's grade 2, which is equivalent to the "conspicuous" grade according to the 2-tiered grading system by Harrison et al,<sup>21</sup> is defined as "numerous large LAs with frequent germinal centers." Although few studies have evaluated the degree of interobserver evaluation agreement,<sup>21</sup> we have some concerns about a lack of reproducibility in these approaches, which provide no quantitative criteria for determining the degree of CLR.

Over the previous decade, the number of LAs has often been used as the standard LA criterion. For example, CLR

**Table 2**  
Status of Crohn-like Lymphoid Reaction (CLR) by the 1-mm Rule and Other Clinicopathologic Characteristics, First Cohort (n = 1,032)<sup>a</sup>

| Variables (No. of Cases) | Inactive CLR (n = 822) | Active CLR (n = 210) | P Value            |
|--------------------------|------------------------|----------------------|--------------------|
| Sex                      |                        |                      | .5440              |
| Male (601)               | 474 (78.9)             | 127 (21.1)           |                    |
| Female (431)             | 348 (80.7)             | 83 (19.3)            |                    |
| Age, y                   | 62.4                   | 59.5                 | .0009              |
| Location                 |                        |                      | .0768 <sup>b</sup> |
| Right-sided colon (217)  | 166 (76.5)             | 51 (23.5)            |                    |
| Left-sided colon (462)   | 365 (79.0)             | 97 (21.0)            |                    |
| Rectum (353)             | 291 (82.4)             | 62 (17.6)            |                    |
| Histologic type          |                        |                      | .0115 <sup>c</sup> |
| Well (322)               | 261 (81.1)             | 61 (18.9)            |                    |
| Moderately (658)         | 520 (79.0)             | 138 (21.0)           |                    |
| Poorly (17)              | 9 (52.9)               | 8 (47.1)             |                    |
| Mucinous (33)            | 30 (90.9)              | 3 (9.1)              |                    |
| Signet-ring cell (2)     | 2 (100.0)              | 0                    |                    |
| Depth of penetration     |                        |                      | .0622 <sup>d</sup> |
| T2 (152)                 | 127 (83.6)             | 25 (16.4)            |                    |
| T3 (812)                 | 646 (79.6)             | 166 (20.4)           |                    |
| T4 (68)                  | 49 (72.1)              | 19 (27.9)            |                    |
| No. of LNs retrieved     | 25.1                   | 28.5                 | .0110              |
| No. of LNs involved      |                        |                      | .0044 <sup>d</sup> |
| 0 (558)                  | 428 (76.7)             | 130 (23.3)           |                    |
| 1-3 (321)                | 261 (81.3)             | 60 (18.7)            |                    |
| 4 (153)                  | 133 (86.9)             | 20 (13.1)            |                    |
| Venous invasion          |                        |                      | .0253              |
| Negative (267)           | 200 (74.9)             | 67 (25.1)            |                    |
| Positive (765)           | 622 (81.3)             | 143 (18.7)           |                    |
| Tumor budding            |                        |                      | .1587 <sup>d</sup> |
| Grade 1                  | 382 (78.6)             | 104 (21.4)           |                    |
| Grade 2                  | 179 (76.8)             | 54 (23.2)            |                    |
| Grade 3                  | 261 (83.4)             | 52 (16.6)            |                    |
| MLH1/MSH2 expression     |                        |                      | .0236              |
| Intact (208)             | 181 (87.0)             | 27 (13.0)            |                    |
| Defective (17)           | 11 (64.7)              | 6 (35.3)             |                    |

LN, lymph node.

<sup>a</sup> Values are presented as No. (%) of cases unless otherwise indicated.

<sup>b</sup> Right-sided colon vs rectum ( $\chi^2$  test).

<sup>c</sup> Poorly vs others (Fisher exact test).

<sup>d</sup> Mann-Whitney  $U$  test.

was scored as present in some studies when at least 3 nodular LAs<sup>25</sup> or 4 nodular LAs<sup>17,18</sup> were counted under a low-power microscopic field. In other studies, 2 or more large LAs in a section<sup>26</sup> or a minimum of 3 LAs per section<sup>16</sup> were regarded as the benchmark for the presence of CLR. However, the actual size of the LAs evaluated was not clarified in these studies. In the present study, if all LAs were counted irrespective of size, no positive correlation would have been observed between the number of LAs and postoperative prognostic outcomes, such as recurrence and disease-specific survival. Our results indicate that the activation of CLR as an antitumor immune response was most markedly characterized by the size of the largest LA. Interestingly, there was no linear correlation between the maximum diameter of the largest LA and prognostic outcome, and we observed a clear cutoff value of 1

**Table 3**  
**Univariate and Multivariate Analyses for Disease-Specific Survival Using the Cox Proportional Hazards Regression Model**

| Variables                      | First Cohort (n = 1,032) |                |         |               |         | Second Cohort (n = 500) |                |                |                |         |
|--------------------------------|--------------------------|----------------|---------|---------------|---------|-------------------------|----------------|----------------|----------------|---------|
|                                | No.                      | Univariate     |         | Multivariate  |         | No.                     | Univariate     |                | Multivariate   |         |
|                                |                          | HR (95% CI)    | P Value | HR (95% CI)   | P Value |                         | HR (95% CI)    | P Value        | HR (95% CI)    | P Value |
| Tumor differentiation          |                          |                |         |               |         |                         |                |                |                |         |
| Well                           | 322                      | 1              |         |               | 210     | 1                       |                |                |                |         |
| Moderate                       | 658                      | 1.4 (1.0-2.0)  | .0336   |               | 247     | 1.6 (1.0-2.7)           | .0445          |                |                |         |
| Others                         | 52                       | 2.2 (1.2-3.9)  | .0067   |               | 43      | 1.7 (0.7-3.7)           | .2155          |                |                |         |
| T stage                        |                          |                |         |               |         |                         |                |                |                |         |
| T2                             | 152                      | 1              |         |               | 26      | 1                       |                | 1              |                |         |
| T3                             | 812                      | 3.7 (1.9-7.3)  | .0001   | 2.0 (1.0-4.0) | .0441   | 369                     | 3.5 (0.5-25.5) | .2129          | 5.5 (0.7-39.8) | .0947   |
| T4                             | 68                       | 6.9 (3.2-14.8) | <.0001  | 3.9 (1.8-8.6) | .0006   | 105                     | 8.0 (1.1-59.1) | .0405          | 8.1 (1.1-60.7) | .0407   |
| N stage                        |                          |                |         |               |         |                         |                |                |                |         |
| N0                             | 558                      | 1              |         |               | 248     | 1                       |                | 1              |                |         |
| N1                             | 321                      | 3.3 (2.3-4.7)  | <.0001  | 2.2 (1.6-3.2) | <.0001  | 194                     | 3.7 (2.1-6.5)  | <.0001         | 3.2 (1.8-5.7)  | <.0001  |
| N2                             | 153                      | 6.8 (4.7-9.8)  | <.0001  | 4.1 (2.8-6.0) | <.0001  | 58                      | 5.4 (2.8-10.4) | <.0001         | 4.0 (2.0-8.0)  | <.0001  |
| Venous invasion                |                          |                |         |               |         |                         |                |                |                |         |
| Negative                       | 267                      | 1              |         |               | 76      | 1                       |                | 1              |                |         |
| Positive                       | 765                      | 1.7 (1.2-2.4)  | .0041   |               | 424     | 5.0 (1.6-15.8)          | .0065          | 3.8 (1.2-12.1) | .0244          |         |
| Tumor budding                  |                          |                |         |               |         |                         |                |                |                |         |
| Grade 1                        | 486                      | 1              |         |               | 149     | 1                       |                | 1              |                |         |
| Grade 2                        | 233                      | 3.0 (2.0-4.6)  | <.0001  | 2.1 (1.4-3.2) | .0005   | 156                     | 1.6 (0.8-3.6)  | .2140          | 1.3 (0.6-2.9)  | .4619   |
| Grade 3                        | 313                      | 5.3 (3.7-7.7)  | <.0001  | 3.2 (2.2-4.7) | <.0001  | 195                     | 4.6 (2.3-9.0)  | <.0001         | 2.3 (1.2-4.7)  | .0186   |
| Status of CLR by the 1-mm rule |                          |                |         |               |         |                         |                |                |                |         |
| Inactive                       | 822                      | 1              |         |               | 314     | 1                       |                | 1              |                |         |
| Active                         | 210                      | 0.4 (0.3-0.6)  | <.0001  | 0.4 (0.3-0.7) | .0004   | 186                     | 0.3 (0.2-0.6)  | .0002          | 0.4 (0.2-0.8)  | .0041   |

CI, confidence interval; CLR, Crohn-like lymphoid reaction; HR, hazard ratio; N, lymph node; T, tumor.

mm, which made a large difference to the recurrence rates in the 2 cohorts analyzed in this study.

Active CLR as defined by the 1-mm rule was also related to younger patient age, poor tumor differentiation, the number of lymph nodes retrieved, and absence of lymph node involvement. Younger patient age<sup>16-18</sup> and poor tumor differentiation<sup>15,18,26</sup> are generally recognized as clinicopathologic characteristics of MSI-associated tumors. As expected, we found a significant correlation between active CLR status as defined by the 1-mm rule and MMR protein status. Only MLH1 and MSH2 were used for MMR in the present study. Thus, a small number of cases with PMS2- or MSH6-only loss may have been missed. We can state that the 1-mm rule is a semiquantitative benchmark for CLR that can also be used as a predictive marker for MSI status.

We are not aware of any publication dealing with CLR status and the number of lymph nodes retrieved. Pihl et al<sup>10</sup> demonstrated a clear correlation between paracortical hyperplasia in regional lymph nodes and perivascular lymphocyte cuffing in the primary tumor. We also found that CLR was associated with the status of histologic features in regional lymph nodes, such as paracortical hyperplasia and germinal center hyperplasia in rectal cancer.<sup>5</sup> The correlation between active CLR and an increased number of retrieved lymph nodes can be explained by the hypothesis that the host

immune response to cancer is systematically expressed in both primary tumor and regional lymph nodes.

Based on our results, active CLR was related not only to a low incidence of locoregional recurrence but also to a low rate of recurrence in distant organs such as the lung and liver. In both cohorts, CLR status as defined by the 1-mm rule had an independent impact on disease-specific survival together with T stage, N stage, and tumor budding. Of note, CLR had a greater impact on survival outcome than conventional histologic parameters such as tumor differentiation and venous invasion, which are presently regarded as important prognostic indicators.<sup>27</sup>

It is well known that lymphocyte infiltration into cancer nests or stroma is a morphological expression of the host antitumor response,<sup>2-7</sup> and this has been demonstrated to have an interactive effect with CLR that confers a survival advantage.<sup>5,14</sup> However, few reports have demonstrated a significant correlation between lymphocytic infiltration quantitatively assessed on H&E slides and survival outcome; some argued that peritumoral lymphatic infiltration was potentially difficult to evaluate objectively.<sup>2,28</sup> In contrast, CLR could be more easily defined and expressed in quantitative terms<sup>10</sup> and a more suitable histopathologic parameter for use in routine practice as an index of the host immune response to cancer. We believe that the 1-mm rule can enhance this attribute of

CLR. We cannot determine the actual reason for interobserver variability in the identification of CLR based on the 1-mm rule, and we believe that future study is required to minimize this problem. The appearance of a germinal center is one of the criteria of Graham's method.<sup>11</sup> However, the standard for LA assessment becomes multifactorial when this feature is added to the criteria. This may be the reason why the presence or absence of a germinal center has not been included in the methods adopted in recent studies.<sup>17,18</sup>

In conclusion, CLR may be evaluated semiquantitatively by assessing the maximum diameter of the largest LA within a tumor. The 1-mm rule can offer simplicity and improved reproducibility in evaluating CLR, which can contribute to effective selection of CRC patients with a favorable survival outcome.

From the <sup>1</sup>Department of Surgery, <sup>2</sup>Department of Laboratory Medicine, <sup>3</sup>Department of Basic Pathology, and <sup>4</sup>Laboratory for Mathematics, National Defense Medical College, Tokorozawa, Japan, and the <sup>5</sup>Laboratory for Statistical Analysis, Center for Genomic Medicine, RIKEN, Wako, Japan.

Address reprint requests to Dr Ueno: Dept. of Surgery, National Defense Medical College, 3-2 Namiki, Tokorozawa, Saitama 359-8513, Japan; e-mail: ueno@ndmc.ac.jp.

## References

- MacCarty WC. Factors which influence longevity in cancer. *Ann Surg.* 1922;76:9-12.
- Jass JR. Lymphocytic infiltration and survival in rectal cancer. *J Clin Pathol.* 1986;39:585-589.
- Ogino S, Noshio K, Irahara N, et al. Lymphocytic reaction to colorectal cancer is associated with longer survival, independent of lymph node count, microsatellite instability, and CpG island methylator phenotype. *Clin Cancer Res.* 2009;15:6412-6420.
- Ropponen KM, Eskelinen MJ, Lipponen PK, et al. Prognostic value of tumour-infiltrating lymphocytes (TILs) in colorectal cancer. *J Pathol.* 1997;182:318-324.
- Ueno H, Mochizuki H, Hase K, et al. A study on the clinical significance of lymphatic tissue responses against rectal cancer. *J Jpn Soc Coloproctol.* 1994;47:430-441.
- Naito Y, Saito K, Shiiba K, et al. CD8<sup>+</sup> T cells infiltrated within cancer cell nests as a prognostic factor in human colorectal cancer. *Cancer Res.* 1998;58:3491-3494.
- Prall F, Dührkop T, Weirich V, et al. Prognostic role of CD8<sup>+</sup> tumor-infiltrating lymphocytes in stage III colorectal cancer with and without microsatellite instability. *Hum Pathol.* 2004;35:808-816.
- Patt DJ, Brynes RK, Vardiman JW, et al. Mesocolic lymph node histology is an important prognostic indicator for patients with carcinoma of the sigmoid colon: an immunomorphologic study. *Cancer.* 1975;35:1388-1397.
- Pihl E, Nairn RC, Milne BJ, et al. Lymphoid hyperplasia: a major prognostic feature in 519 cases of colorectal carcinoma. *Am J Pathol.* 1980;100:469-480.
- Pihl E, Malahy MA, Khankhanian N, et al. Immunomorphological features of prognostic significance in Dukes' class B colorectal carcinoma. *Cancer Res.* 1977;37:4145-4149.
- Graham DM, Appelman HD. Crohn's-like lymphoid reaction and colorectal carcinoma: a potential histologic prognosticator. *Mod Pathol.* 1990;3:332-335.
- Harrison JC, Dean PJ, El-Zeky F, et al. Impact of the Crohn's-like lymphoid reaction on staging of right-sided colon cancer: results of multivariate analysis. *Hum Pathol.* 1995;26:31-38.
- Messerini L, Cianchi F, Cortesini C, et al. Incidence and prognostic significance of occult tumor cells in lymph nodes from patients with stage IIA colorectal carcinoma. *Hum Pathol.* 2006;37:1259-1267.
- Murphy J, O'Sullivan GC, Lee G, et al. The inflammatory response within Dukes' B colorectal cancers: implications for progression of micrometastases and patient survival. *Am J Gastroenterol.* 2000;95:3607-3614.
- Gafà R, Maestri I, Matteuzzi M, et al. Sporadic colorectal adenocarcinomas with high-frequency microsatellite instability. *Cancer.* 2000;89:2025-2037.
- Greenson JK, Huang S-C, Herron C, et al. Pathologic predictors of microsatellite instability in colorectal cancer. *Am J Surg Pathol.* 2009;33:126-133.
- Hyde A, Fontaine D, Stuckless S, et al. A histology-based model for predicting microsatellite instability in colorectal cancers. *Am J Surg Pathol.* 2010;34:1820-1829.
- Jenkins MA, Hayashi S, O'Shea A-M, et al. Pathology features in Bethesda guidelines predict colorectal cancer microsatellite instability: a population-based study. *Gastroenterology.* 2007;133:48-56.
- Risio M, Reato G, di Celle PF, et al. Microsatellite instability is associated with the histological features of the tumor in nonfamilial colorectal cancer. *Cancer Res.* 1996;56:5470-5474.
- Wright CL, Stewart ID. Histopathology and mismatch repair status of 458 consecutive colorectal carcinomas. *Am J Surg Pathol.* 2003;27:1393-1406.
- Harrison JC, Dean PJ, El-Zeky F, et al. From Dukes through Jass: pathological prognostic indicators in rectal cancer. *Hum Pathol.* 1994;25:498-505.
- Japanese Society for Cancer of the Colon and Rectum. *Japanese Classification of Colorectal Carcinoma.* 2nd English ed. Tokyo, Japan: Kanehara; 2009.
- Ueno H, Murphy J, Jass JR, et al. Tumour 'budding' as an index to estimate the potential of aggressiveness in rectal cancer. *Histopathology.* 2002;40:127-132.
- Jass JR, Love SB, Northover JMA. A new prognostic classification of rectal cancer. *Lancet.* 1987;1:1303-1306.
- Young J, Simms LA, Biden KG, et al. Features of colorectal cancers with high-level microsatellite instability occurring in familial and sporadic settings: parallel pathways of tumorigenesis. *Am J Pathol.* 2001;159:2107-2116.
- Alexander J, Watanabe T, Wu T-T, et al. Histopathological identification of colon cancer with microsatellite instability. *Am J Pathol.* 2001;158:527-535.
- National Comprehensive Cancer Network. NCCN clinical practice guidelines in oncology—colon cancer (version 3, 2012). [http://www.nccn.org/professionals/physician\\_gls/pdf\\_colon.pdf](http://www.nccn.org/professionals/physician_gls/pdf_colon.pdf). Accessed June 14, 2012.
- Deans GT, Heatley M, Anderson N, et al. Jass' classification revisited. *J Am Coll Surg.* 1994;179:11-17.



# First and Only FDA Cleared Digital Cytology System

**Genius™ Cervical AI**

**Genius™ Review Station**

**Genius™ Digital Imager**

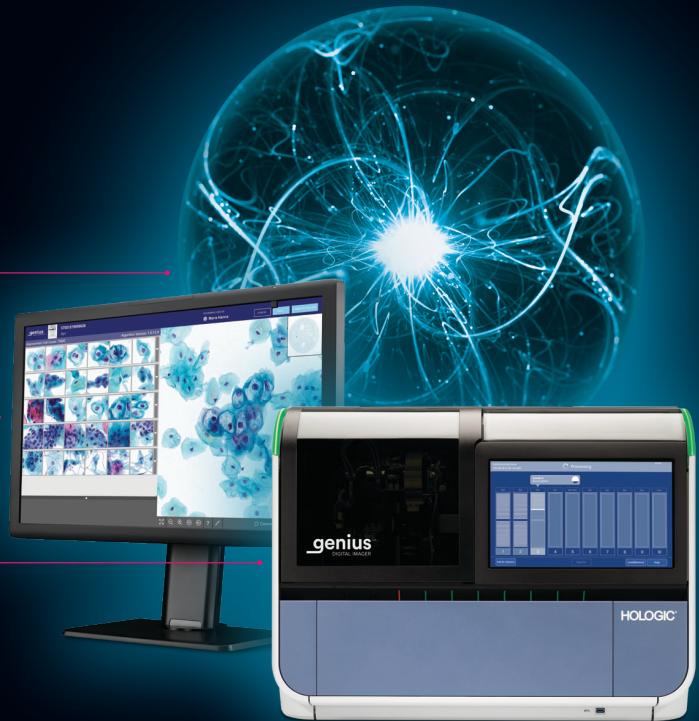

## Empower Your Genius With Ours

**Make a Greater Impact on Cervical Cancer**  
with the Advanced Technology of the  
Genius™ Digital Diagnostics System

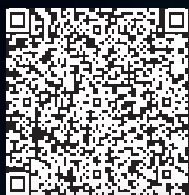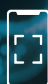

Click or Scan  
to discover more

ADS-04159-001 Rev 001 © 2024 Hologic, Inc. All rights reserved. Hologic, Genius, and associated logos are trademarks and/or registered trademarks of Hologic, Inc. and/or its subsidiaries in the United States and/or other countries. This information is intended for medical professionals in the U.S. and other markets and is not intended as a product solicitation or promotion where such activities are prohibited. Because Hologic materials are distributed through websites, podcasts and tradeshows, it is not always possible to control where such materials appear. For specific information on what products are available for sale in a particular country, please contact your Hologic representative or write to [diagnostic.solutions@hologic.com](mailto:diagnostic.solutions@hologic.com).

**genius™**  
DIGITAL DIAGNOSTICS
